# Supplementary material for: Assessing the impact of scaling up a health systems strengthening initiative in southeastern Madagascar: baseline socio-economic and health conditions in Vatovavy Region, Madagascar
Source: Research Square preprint supplement (doi:10.21203/rs.3.rs-8595498/v1), 2026-01-28
Supplement: Supplementary file 1 [file 6689d824508849941f9d8059.pdf]

**Table S1. Pivot support by HSS component and districts over time**

| HSS component                           | District    | Baseline (2023)                                                                                                            | Completion of regional expansion                                                                                           |
|-----------------------------------------|-------------|----------------------------------------------------------------------------------------------------------------------------|----------------------------------------------------------------------------------------------------------------------------|
| User fee removal                        | Ifanadiana  | All district residents                                                                                                     | Population to be determined in consultation with MoPH                                                                      |
|                                         | Nosy Varika | None                                                                                                                       | Pregnant women and children under-five                                                                                     |
|                                         | Mananjary   | None                                                                                                                       | Pregnant women and children under-five                                                                                     |
| Community health program                | Ifanadiana  | CHWs professionalized and provide community-based care                                                                     | CHWs professionalized and provide community-based care                                                                     |
|                                         | Nosy Varika | Ad hoc program supported by multiple partners                                                                              | CHWs professionalized and provide community-based care                                                                     |
|                                         | Mananjary   | Ad hoc program supported by multiple partners                                                                              | CHWs professionalized and provide community-based care                                                                     |
| Primary care health centers             | Ifanadiana  | 21 health centers strengthened with infrastructure improvement, supply chain support, clinical staff recruited and trained | 21 health centers strengthened with infrastructure improvement, supply chain support, clinical staff recruited and trained |
|                                         | Nosy Varika | None                                                                                                                       | 26 health centers strengthened with infrastructure improvement, supply chain support, clinical staff recruited and trained |
|                                         | Mananjary   | None                                                                                                                       | 41 health centers strengthened with infrastructure improvement, supply chain support, clinical staff recruited and trained |
| District and regional referral hospital | Ifanadiana  | Hospital strengthened with infrastructure improvement, supply chain support, clinical staff recruited and trained          | Hospital strengthened with infrastructure improvement, supply chain support, clinical staff recruited and trained          |
|                                         | Nosy Varika | None                                                                                                                       | Hospital strengthened with infrastructure improvement, supply chain support, clinical staff recruited and trained          |

|                                |             |                                          |                                                                                                                   |
|--------------------------------|-------------|------------------------------------------|-------------------------------------------------------------------------------------------------------------------|
|                                | Mananjary   | None                                     | Hospital strengthened with infrastructure improvement, supply chain support, clinical staff recruited and trained |
| Referral and patient transport | Ifanadiana  | Ambulance, referral transport costs paid | Ambulance, referral transport costs paid                                                                          |
|                                | Nosy Varika | None                                     | Ambulance, boat for emergency referral, referral transport costs paid                                             |
|                                | Manajary    | None                                     | Ambulance, referral transport costs paid                                                                          |

**Table S2: List of indicators**

| Indicators                    | Description                                                                                                                                           |
|-------------------------------|-------------------------------------------------------------------------------------------------------------------------------------------------------|
| Neonatal mortality            | Number of children who died before the first month per 1000 live births                                                                               |
| Infant mortality              | Number of children who died before their first birthday per 1000 live births                                                                          |
| Under5 mortality              | Number of children who died before 5th birthday per 1000 live births                                                                                  |
| Maternal mortality            | Women ages 15–49 who died within 12 months of the end of a pregnancy per women with a reported pregnancy                                              |
| Stunting prevalence           | Number of children under age 5 who are < –2 SD of median height-for-age of World Health Organization (WHO) standard                                   |
| Wasting prevalence            | Number of children under age 5 who are < –2 SD of median weight-for-height of World Health Organization (WHO) standard                                |
| Met need on Family Planning   | Number of women ages 15-49 using a family planning method among those wishing to limit or stop births                                                 |
| Antenatal care coverage       | Number of women 15–49 with a live birth in last 2 years who were attended at least 1 time by a skilled provider for antenatal care for the last birth |
| Skilled attendant at delivery | Number of women 15–49 with a live birth in last 2 years who were attended by a skilled provider during the last birth                                 |
| Illness incidence             | Number of children under age 5 with at least one of the three illnesses: diarrheal illness, fever or Acute Respiratory Infection                      |
| Care seeking for illness      | Number of children under age 5 with illness in last 2 weeks for whom advice or treatment was sought from a health facility or provider                |
| Wealth quintile               | Value of household wealth index closest to but less than 20%, 40%, 60% and 80% of the cumulative distribution                                         |

**Fig. S1: Barriers to healthcare access reported by individuals with an illness in the month preceding the survey and did not seek care, Vatovavy Region, Madagascar, 2023**

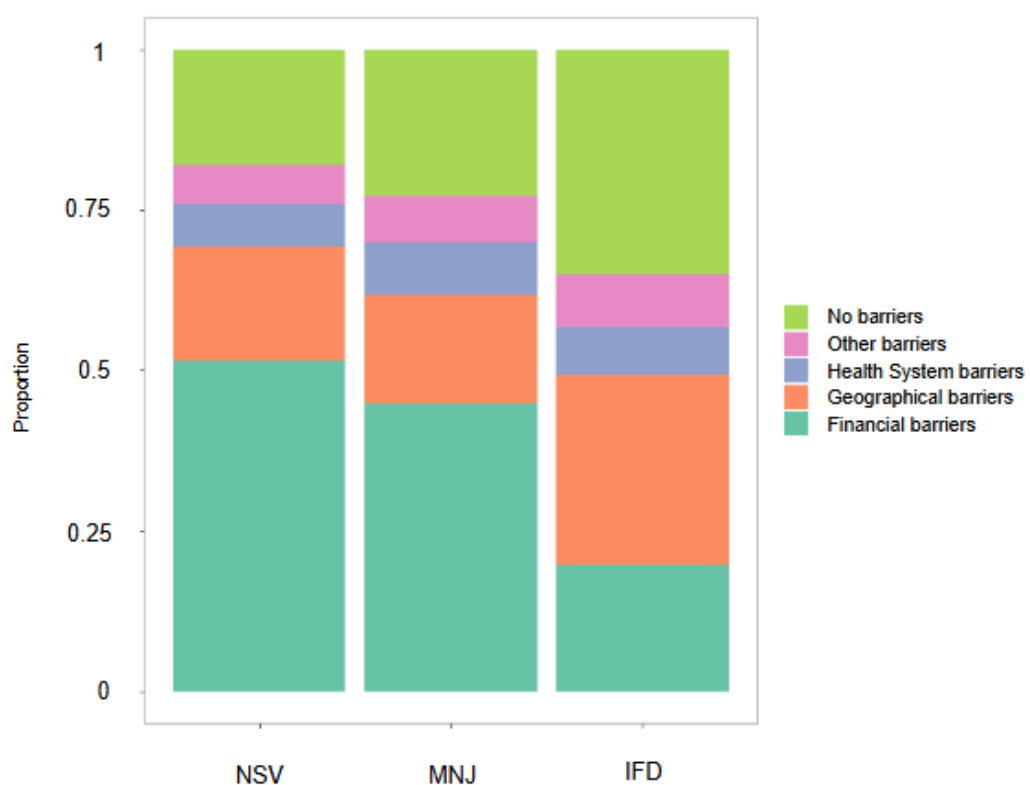

**Table S3: Inequalities in healthcare coverage by wealth and geographic access in Vatovavy Region, Madagascar, 2023.**

| Healthcare coverage indicators            | District    | Economic inequalities |           |         | Geographic inequalities |         |         |
|-------------------------------------------|-------------|-----------------------|-----------|---------|-------------------------|---------|---------|
|                                           |             | Poorest               | Wealthier | p_value | Farthest                | Nearest | p_value |
| ANC4 (4+ visit with skilled provider)     | Nosy Varika | 23.4                  | 33.2      | 0.022   | 18,6                    | 37,5    | <0.001  |
|                                           | Mananjary   | 49.8                  | 57.5      | 0.232   | 51,1                    | 56,8    | 0,383   |
|                                           | Ifanadiana  | 42.1                  | 57.3      | 0.052   | 36,6                    | 68,7    | <0.001  |
| Birth delivered at health care facility   | Nosy Varika | 2.6                   | 10.5      | <0.001  | 3,3                     | 10,1    | 0,006   |
|                                           | Mananjary   | 21.8                  | 31.9      | 0.087   | 26,4                    | 28,6    | 0,772   |
|                                           | Ifanadiana  | 17.7                  | 38        | 0.002   | 14,8                    | 48,3    | <0.001  |
| Postnatal care with skilled provider      | Nosy Varika | 4.8                   | 15.1      | 0.001   | 7,3                     | 13,4    | 0,074   |
|                                           | Mananjary   | 23.8                  | 37        | 0.010   | 30,6                    | 32,1    | 0,842   |
|                                           | Ifanadiana  | 17.6                  | 36.9      | 0.003   | 14,5                    | 46,7    | <0.001  |
| All vaccinations for children under 5     | Nosy Varika | 11.4                  | 8.9       | 0.533   | 5,9                     | 13,7    | 0,046   |
|                                           | Mananjary   | 30                    | 35.2      | 0.501   | 22,7                    | 41,6    | 0,066   |
|                                           | Ifanadiana  | 25.4                  | 43.6      | 0.015   | 23,1                    | 54,7    | <0.001  |
| At least one vaccine dose for children U5 | Nosy Varika | 37.4                  | 53.2      | 0.015   | 29,1                    | 62      | <0.001  |
|                                           | Mananjary   | 70.6                  | 80.4      | 0.071   | 70,9                    | 81,4    | 0,161   |
|                                           | Ifanadiana  | 64.6                  | 80.1      | 0.006   | 64,9                    | 86,4    | 0,007   |
| Illness care seeking for children under 5 | Nosy Varika | 13.4                  | 33.5      | <0.001  | 17,1                    | 36,7    | 0,003   |
|                                           | Mananjary   | 33.6                  | 29.7      | 0.520   | 35                      | 29,5    | 0,49    |
|                                           | Ifanadiana  | 40.2                  | 56.2      | 0.006   | 33,2                    | 65,5    | <0.001  |
| Illness care seeking for adolescent       | Nosy Varika | 15                    | 17.7      | 0.869   | 12,3                    | 21,7    | 0,024   |
|                                           | Mananjary   | 26.1                  | 28.5      | 0.637   | 19                      | 33,4    | 0,005   |
|                                           | Ifanadiana  | 36.3                  | 35.2      | 0.869   | 28,8                    | 43,6    | 0,024   |
| Illness care seeking for adult            | Nosy Varika | 35.2                  | 40.1      | 0.04    | 23,6                    | 50,2    | 0,031   |
|                                           | Mananjary   | 21.1                  | 26.7      | 0.106   | 22,8                    | 25,8    | 0,419   |
|                                           | Ifanadiana  | 35.2                  | 40.1      | 0.282   | 16,4                    | 21,8    | <0.001  |
